# Supplementary material
Source: Springer Nature journal article supplement (https://www.springermedizin.de/resource/supplementary/12913_2007_587_MOESM3_ESM.pdf/9535484)
Supplement: MOESM3 [file 9535484]

HR directorate

Public Service

Ministry of Health

Local  
Government

Other ministries  
responsible for:

- education
- finance
- transport
- housing
- security
